# Supplementary material
Source: publisher figshare collection journal article supplement (https://karger.figshare.com/articles/dataset/_/21678884)
Supplement: Supplementary file 1 [file 1]

Search strategy for PubMed:

((((DAPT) OR (dual antiplatelet therapy)) AND (((shortened DAPT) OR (prolonged DAPT)) OR (extended DAPT)) OR (duration))) AND (((chronic renal insufficiency AND (ffrt[Filter])) OR (chronic kidney insufficiency AND (ffrt[Filter])) OR (chronic kidney disease AND (ffrt[Filter])) OR (end stage renal disease AND (ffrt[Filter])) AND (ffrt[Filter])) AND (ffrt[Filter])) AND (((percutaneous coronary intervention) OR (percutaneous coronary revascularization)) OR (PCI)) OR (stent))

Search strategy for Embase:

#1 ((antiplatelet AND combination AND therapy:ab,ti OR combination) AND antiplatelet AND therapy:ab,ti OR dual) AND 'anti platelet' AND therapy:ab,ti

#2 (((((((chronic AND kidney AND disease:ab,ti OR chronic) AND kidney AND insufficiency:ab,ti OR chronic) AND renal AND disease:ab,ti OR chronic) AND renal AND failure:ab,ti OR chronic) AND renal AND insufficiency:ab,ti OR kidney) AND chronic AND failure:ab,ti OR kidney) AND disease, AND chronic:ab,ti OR kidney) AND failure, AND chronic:ab,ti OR kidney) AND function, AND chronic AND disease:ab,ti OR renal) AND insufficiency, AND chronic:ab,ti

#3 (((percutaneous AND coronary AND intervention:ab,ti OR 'drug eluting') AND stent:ab,ti OR drug) AND coated AND stent:ab,ti OR 'drug covered') AND stents:ab,ti OR bare) AND metal AND stents:ab,ti

Search strategy for Cochrane:

#1 (dual antiplatelet therapy):ti,ab,kw OR (shortened DAPT):ti,ab,kw OR (prolonged DAPT):ti,ab,kw

#2 (chronic kidney disease):ti,ab,kw OR ("end-stage renal disease"):ti,ab,kw

#3 (percutaneous coronary intervention):ti,ab,kw OR (percutaneous coronary revascularization):ti,ab,kw OR (PCI):ti,ab,kw OR ("stent graft"):ti,ab,kw

#4 #1 AND #2 AND #3
